# Supplementary material for: Effect of Disease Severity in Asthma and Chronic Obstructive Pulmonary Disease on Inhaler-Specific Inhalation Profiles Through the ELLIPTA® Dry Powder Inhaler
Source: PubMed Central journal article supplement — J Aerosol Med Pulm Drug Deliv. 2015 Dec 1;28(6):486–97. doi: 10.1089/jamp.2015.1224 (PMC4685483; doi:10.1089/jamp.2015.1224), 2015-12-01
Supplement: Supp_Fig1.pdf [file Supp_Fig1.pdf]

## Supplementary Data

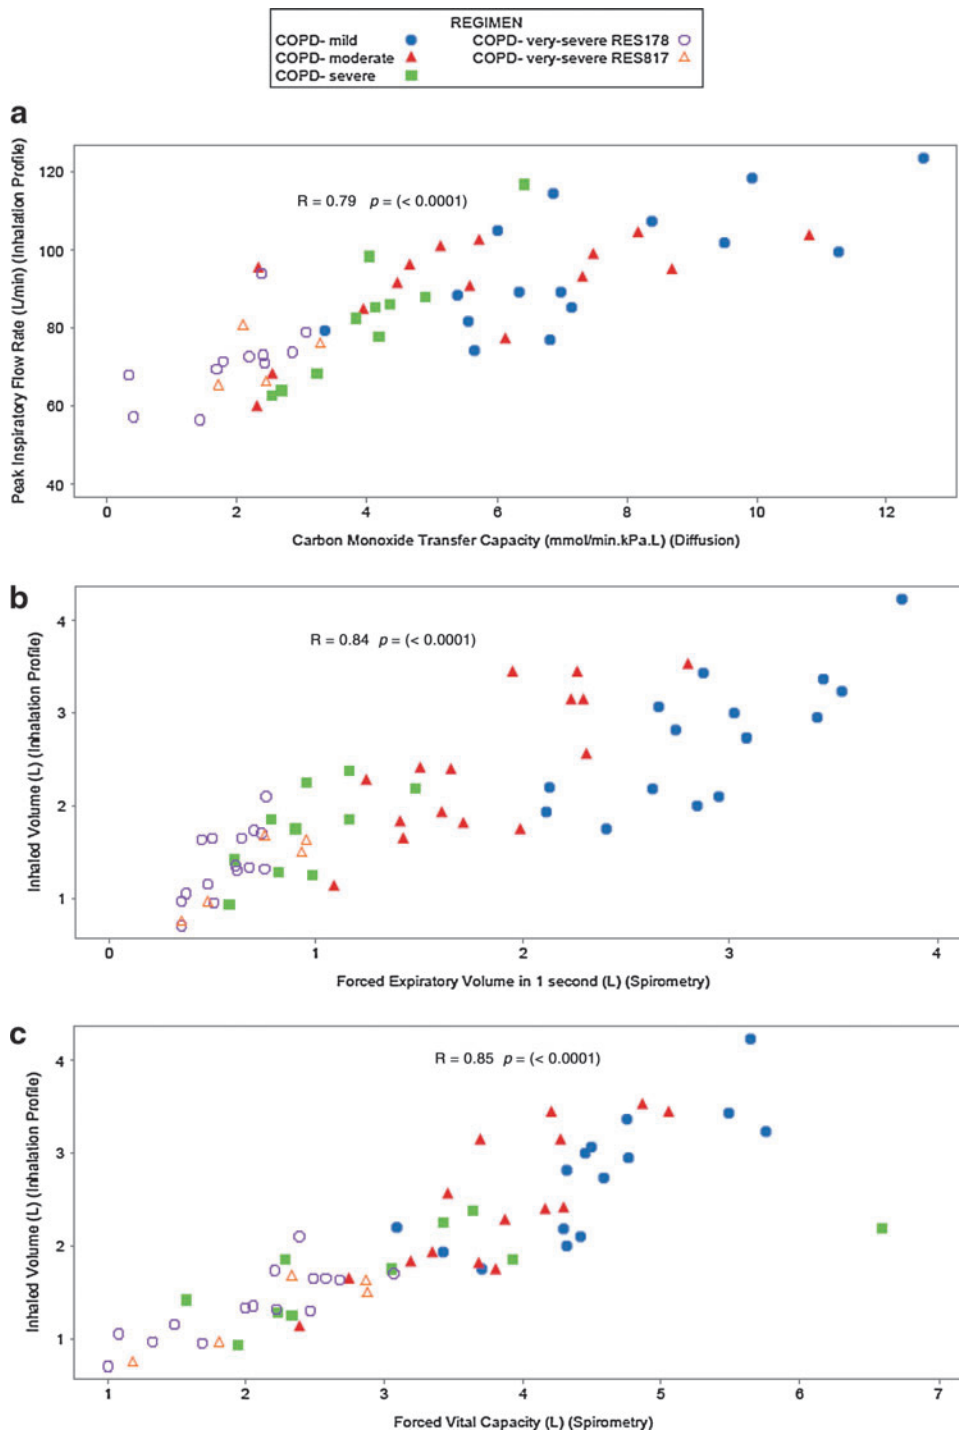

**SUPPLEMENTARY FIG. S1.** Correlation figures for COPD patients only for (a) PIFR (via the ELLIPTA DPI) versus DLCO, (b) inhaled volume (via the ELLIPTA DPI) versus FEV<sub>1</sub> (spirometry), (c) inhaled volume (via the ELLIPTA DPI) versus FVC (spirometry), (d) inhaled volume (via the ELLIPTA DPI) versus alveolar volume, and (e) inhaled volume (via the ELLIPTA DPI) versus DLCO. (All COPD patients). COPD, chronic obstructive pulmonary disease; DLCO, diffusing capacity of the lung for carbon monoxide; DPI, dry powder inhaler; FEV<sub>1</sub>, forced expiratory volume in 1 second; FVC, forced vital capacity; PEFR, peak expiratory flow rate; PIFR, peak inspiratory flow rate.

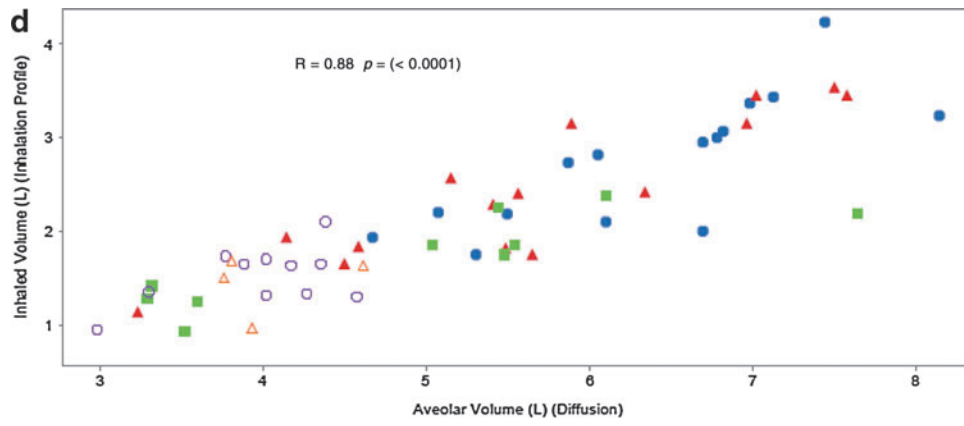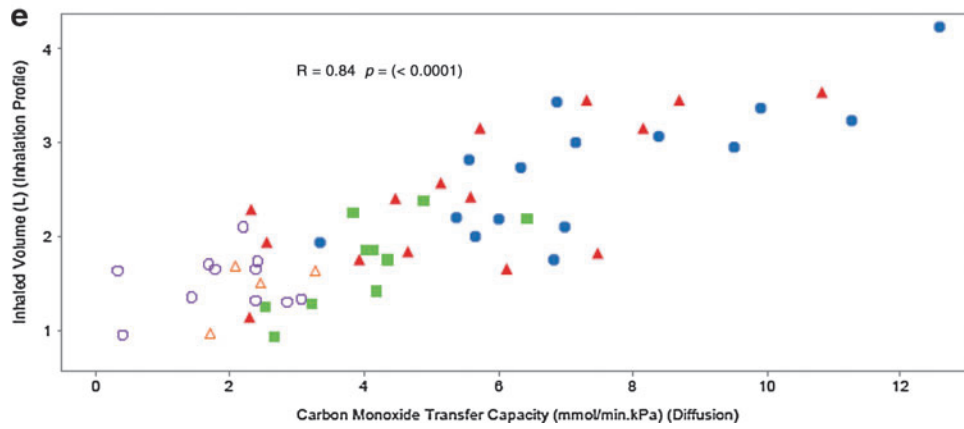

**SUPPLEMENTARY FIG. S1.** (Continued).
